# Supplementary material for: Solvothermal synthesis of discrete cages and extended networks comprising {Cr(iii)3O(O2CR)3(oxime)3}2− (R = H, CH3, C(CH3)3, C14H9) building blocks
Source: Royal Society of Chemistry journal article supplement (doi:10.1039/c6ra14811e), 2016-01-01
Supplement: c6ra14811e1.pdf [file c6ra14811e1.pdf]

*Electronic Supplementary Information*

## **Solvothermal Synthesis of Discrete Cages and Extended Networks Comprising {Cr(III)<sub>3</sub>O(O<sub>2</sub>CR)<sub>3</sub>(oxime)<sub>3</sub>}<sub>2</sub>- (R = H, CH<sub>3</sub>, C(CH<sub>3</sub>)<sub>3</sub>, C<sub>14</sub>H<sub>9</sub>) Building Blocks**

*Edel Houton,<sup>b</sup> Priyanka Comar,<sup>c</sup> Mateusz B. Pitak,<sup>e</sup> Simon J. Coles,<sup>e</sup> Alan. G. Ryder,<sup>b</sup>  
Stergios Piligkos,<sup>d</sup> Euan K. Brechin,<sup>c</sup> and Leigh F. Jones<sup>\*a,b</sup>*

<sup>a</sup> *School of Chemistry, Bangor University, Bangor, Wales. LL57 2DG. Tel: +44(0)1248-38-2391.  
Email: [leigh.jones@bangor.ac.uk](mailto:leigh.jones@bangor.ac.uk)*

<sup>b</sup> *School of Chemistry, NUI Galway, University Road, Galway, Ireland.*

<sup>c</sup> *EaStCHEM School of Chemistry, Joseph Black Building, University of Edinburgh, West Mains  
Road, Edinburgh, Scotland. EH9 3JJ. Email: [ebrechin@staffmail.ed.ac.uk](mailto:ebrechin@staffmail.ed.ac.uk)*

<sup>d</sup> *Department of Chemistry, University of Copenhagen, Universitetsparken 5, DK-2100, Denmark.*

<sup>e</sup> *UK National Crystallographic Service, Chemistry, Faculty of Natural and Environmental Sciences,  
University of Southampton, England, UK. SO17 1BJ.*

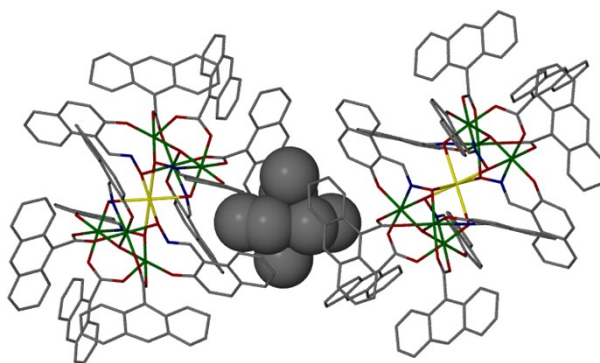

**Figure S1** Two adjacent {NaCr(III)<sub>6</sub>O<sub>2</sub>(O<sub>2</sub>C-C<sub>14</sub>H<sub>9</sub>)<sub>6</sub>(Naphth-sao)<sub>6</sub>}<sup>3-</sup> cages in **1** forming a hydrophobic pocket accommodating a space-fill represented [NEt<sub>4</sub>]<sup>+</sup> counter anion (grey spheres).

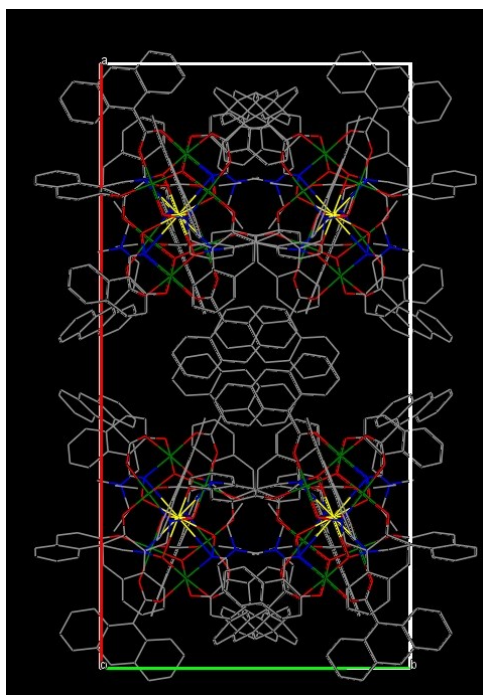

**Figure S2** Crystal packing observed in **1** as viewed along the  $c$  unit cell direction. All hydrogen atoms and solvent molecules of crystallisation have been omitted for clarity. Colour code as main text.

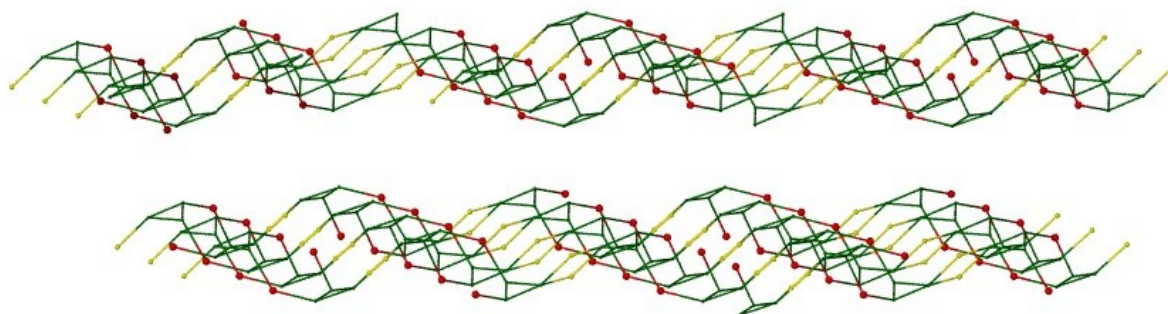

**Figure S3** The 2-D sheets in **2** as viewed along the  $b$  direction of the unit cell. Colour code: Green (Cr), Yellow (Na), Red (O). All other atoms have been omitted for simplification and clarity.

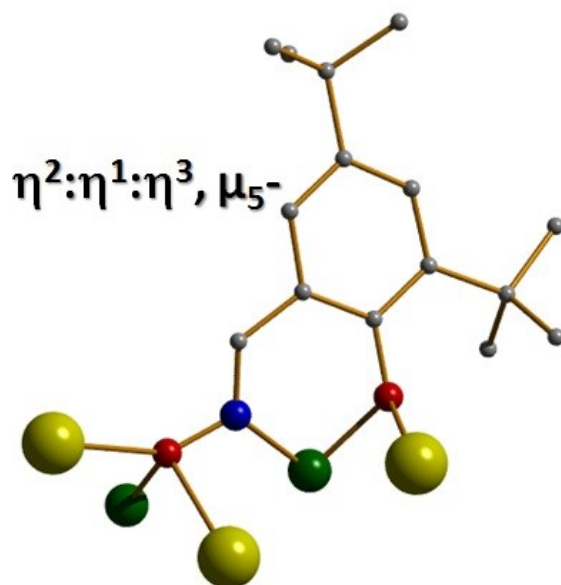

**Figure S4** Bonding mode exhibited by the 3,5-di-*tert*-Bu-sao<sup>2-</sup> ligands in **3**.

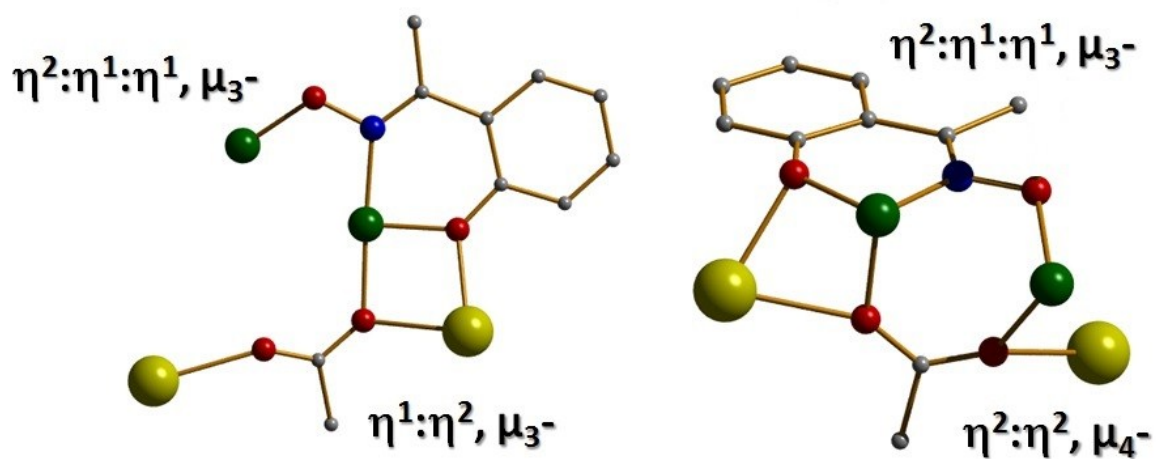

**Figure S5:** The bridging arrangements exhibited by the Me-sao<sup>2-</sup> and acetate anions in the 2D network in **4**.

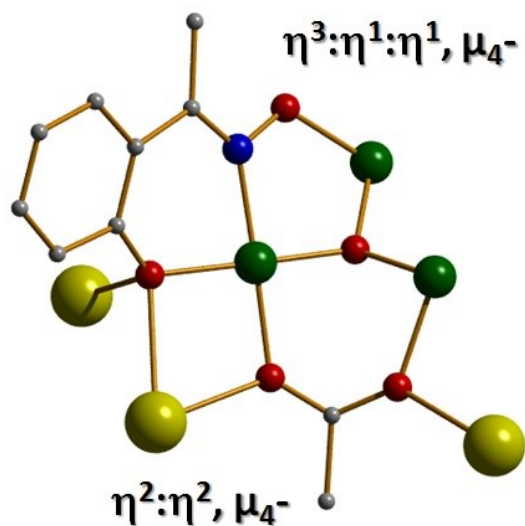

**Figure S6** The bridging arrangements exhibited by the Me-sao<sup>2-</sup> and acetate anions in the 2D network in **5**.

**Table S1** Crystal data obtained from complexes **1-3**.

|                          | <b>1</b>                                                                                         | <b>2</b>                                                                                        | <b>3</b>                                                                                          |
|--------------------------|--------------------------------------------------------------------------------------------------|-------------------------------------------------------------------------------------------------|---------------------------------------------------------------------------------------------------|
| Formula <sup>a</sup>     | C <sub>172</sub> H <sub>136</sub> N <sub>8</sub> O <sub>26</sub> Na <sub>1</sub> Cr <sub>6</sub> | C <sub>96</sub> H <sub>88</sub> N <sub>12</sub> O <sub>30</sub> Na <sub>2</sub> Cr <sub>6</sub> | C <sub>132</sub> H <sub>198</sub> N <sub>12</sub> O <sub>26</sub> Na <sub>4</sub> Cr <sub>6</sub> |
| <i>M</i> <sub>w</sub>    | 3065.87                                                                                          | 2237.68                                                                                         | 2772.98                                                                                           |
| Crystal System           | Monoclinic                                                                                       | Monoclinic                                                                                      | Trigonal                                                                                          |
| Space group              | C2/c                                                                                             | P2 <sub>1</sub> /n                                                                              | R-3c                                                                                              |
| <i>a</i> /Å              | 39.800(2)                                                                                        | 17.8061(18)                                                                                     | 26.9779(12)                                                                                       |
| <i>b</i> /Å              | 17.2760(6)                                                                                       | 12.4863(14)                                                                                     | 26.9779(12)                                                                                       |
| <i>c</i> /Å              | 30.452(2)                                                                                        | 22.4726(18)                                                                                     | 71.622(4)                                                                                         |
| <i>α</i> <sup>o</sup>    | 90                                                                                               | 90                                                                                              | 90                                                                                                |
| <i>β</i> <sup>o</sup>    | 121.745(4)                                                                                       | 91.553(9)                                                                                       | 90                                                                                                |
| <i>γ</i> <sup>o</sup>    | 90                                                                                               | 90                                                                                              | 120                                                                                               |
| <i>V</i> /Å <sup>3</sup> | 17805.9(19)                                                                                      | 4994.5(9)                                                                                       | 45143(5)                                                                                          |
| <i>Z</i>                 | 4                                                                                                | 2                                                                                               | 12                                                                                                |

|                                                |                     |                    |                   |
|------------------------------------------------|---------------------|--------------------|-------------------|
| <i>T</i> /K                                    | 150(2)              | 150(2)             | 150(2)            |
| $\lambda^b/\text{\AA}$                         | 0.7107              | 0.7107             | 0.7107            |
| <i>D<sub>v</sub></i> /g cm <sup>-3</sup>       | 1.144               | 1.488              | 1.224             |
| $\mu(\text{Mo-K}\alpha)/\text{mm}^{-1}$        | 0.419               | 0.724              | 0.496             |
| Meas./indep. ( <i>R</i> <sub>int</sub> ) refl. | 72141/21163(0.2071) | 9115/4123 (0.1742) | 8855/4076(0.2348) |
| Restraints, Parameters                         | 2210, 1945          | 0, 646             | 1286, 616         |
| wR2 (all data) <sup>c</sup>                    | 0.4039              | 0.3020             | 0.2509            |
| <i>R</i> 1 <sup>d,e</sup>                      | 0.1343              | 0.0967             | 0.0907            |
| Goodness of fit on <i>F</i> <sup>2</sup>       | 0.955               | 1.035              | 1.020             |

<sup>a</sup> Includes guest molecules (Note: Solvents of crystallisation in **1** and **3** respectively are not counted in formula as were calculated using SQUEEZE program.<sup>b</sup> Mo-K $\alpha$  radiation, graphite monochromator. <sup>c</sup>  $wR2 = [\sum w(|F_o|^2 - |F_c|^2)|^2 / \sum w|F_o|^2]^{1/2}$ . <sup>d</sup> For observed data. <sup>e</sup>  $R1 = \sum ||F_o| - |F_c|| / \sum |F_o|$

**Table S2** Crystal data obtained from extended networks **4** and **5**.

|                                               | <b>4</b>                                                                                       | <b>5.3MeCN</b>                                                                                 |
|-----------------------------------------------|------------------------------------------------------------------------------------------------|------------------------------------------------------------------------------------------------|
| Formula <sup>a</sup>                          | C <sub>62</sub> H <sub>66</sub> N <sub>7</sub> O <sub>27</sub> Na <sub>3</sub> Cr <sub>6</sub> | C <sub>36</sub> H <sub>39</sub> N <sub>6</sub> O <sub>19</sub> Na <sub>2</sub> Cr <sub>3</sub> |
| <i>M</i> <sub>w</sub>                         | 1719.16                                                                                        | 1084.70                                                                                        |
| Crystal System                                | Monoclinic                                                                                     | Trigonal                                                                                       |
| Space group                                   | I2/a                                                                                           | R-3                                                                                            |
| <i>a</i> /Å                                   | 26.3193(11)                                                                                    | 15.5335(5)                                                                                     |
| <i>b</i> /Å                                   | 13.1295(5)                                                                                     | 15.5335(5)                                                                                     |
| <i>c</i> /Å                                   | 22.7708(12)                                                                                    | 36.608(2)                                                                                      |
| <i>α</i> /°                                   | 90                                                                                             | 90                                                                                             |
| <i>β</i> /°                                   | 113.736(5)                                                                                     | 90                                                                                             |
| <i>γ</i> /°                                   | 90                                                                                             | 120                                                                                            |
| <i>V</i> /Å <sup>3</sup>                      | 7203.0(6)                                                                                      | 7649.8(6)                                                                                      |
| <i>Z</i>                                      | 4                                                                                              | 6                                                                                              |
| <i>T</i> /K                                   | 150(3)                                                                                         | 150(3)                                                                                         |
| <i>λ</i> <sup>b</sup> /Å                      | 0.7107                                                                                         | 0.7107                                                                                         |
| <i>D</i> <sub>c</sub> /g cm <sup>-3</sup>     | 1.585                                                                                          | 1.413                                                                                          |
| <i>μ</i> (Mo-Kα)/mm <sup>-1</sup>             | 0.977                                                                                          | 0.726                                                                                          |
| Meas./indep.( <i>R</i> <sub>int</sub> ) refl. | 6590/4621 (0.0387)                                                                             | 3118/2744 (0.00350)                                                                            |
| Restraints, Parameters                        | 0, 475                                                                                         | 0, 205                                                                                         |
| wR2 (all data) <sup>c</sup>                   | 0.1315                                                                                         | 0.1304                                                                                         |
| <i>R</i> <sup>d,e</sup>                       | 0.0483                                                                                         | 0.0473                                                                                         |
| Goodness of fit on <i>F</i> <sup>2</sup>      | 1.019                                                                                          | 1.146                                                                                          |

<sup>a</sup> Includes guest molecules. <sup>b</sup> Mo-Kα radiation, graphite monochromator. <sup>c</sup> wR2 =  $[\sum w(|F_o|^2 - |F_c|^2)|^2] / \sum w|F_o|^2]^2$ . <sup>d</sup> For observed data. <sup>e</sup>  $R1 = \sum ||F_o| - |F_c|| / \sum |F_o|$

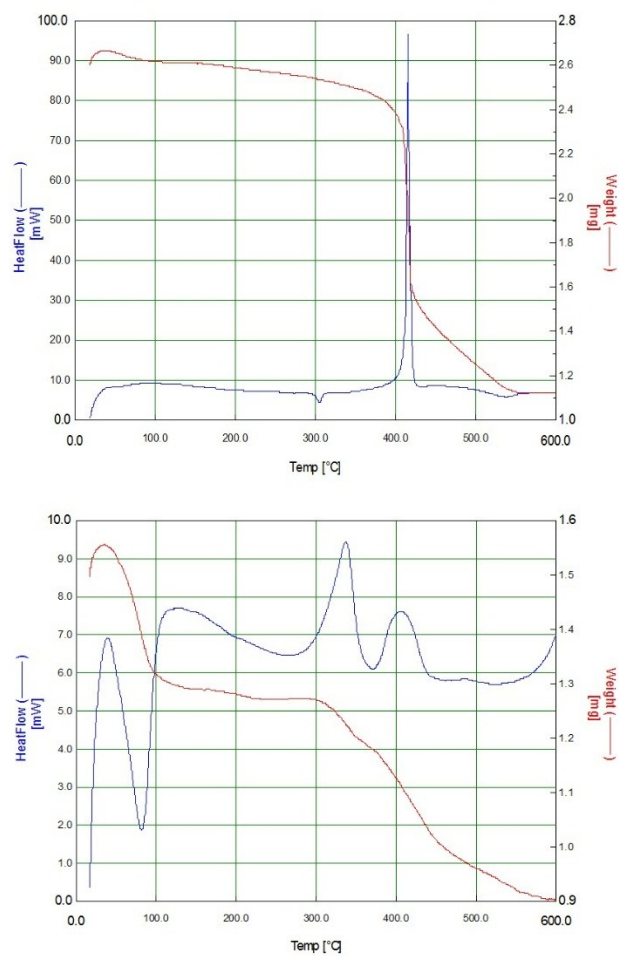

**Figure S7** TGA trace obtained on crystalline samples of and **3** (top) and **5** (bottom) analyzed in the 25-600 °C temperature range in an N<sub>2</sub> atmosphere.
